# Supplementary material for: Computational and Preclinical Analysis of 2-(4-Methyl)benzylidene-4,7-dimethyl Indan-1-one (IPX-18): A Novel Arylidene Indanone Small Molecule with Anti-Inflammatory Activity via NF-κB and Nrf2 Signaling
Source: MDPI journal article supplement (doi:10.3390/biomedicines11030716), 2023-02-27
Supplement: s1 [file s1]

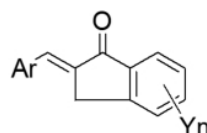

**Figure S1.** Schematic synthesis of IPX-18.

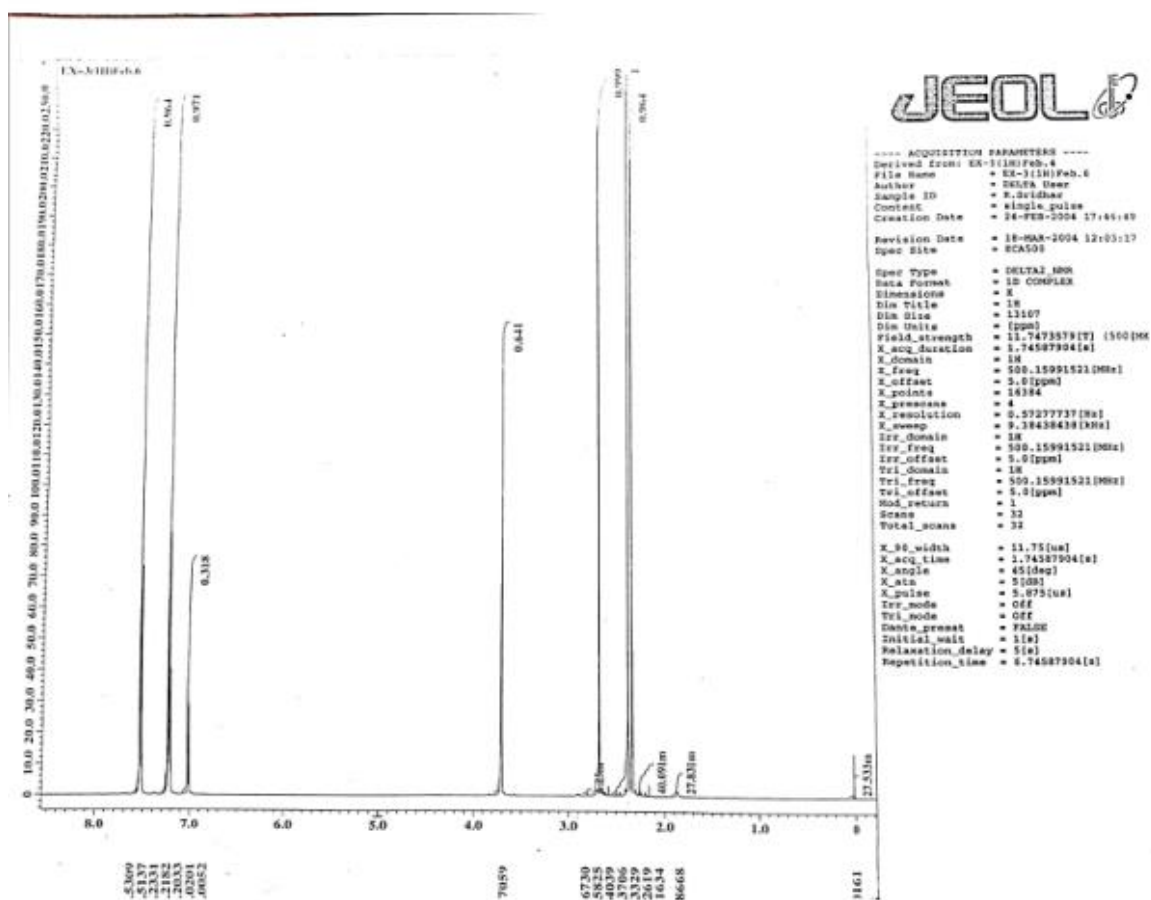

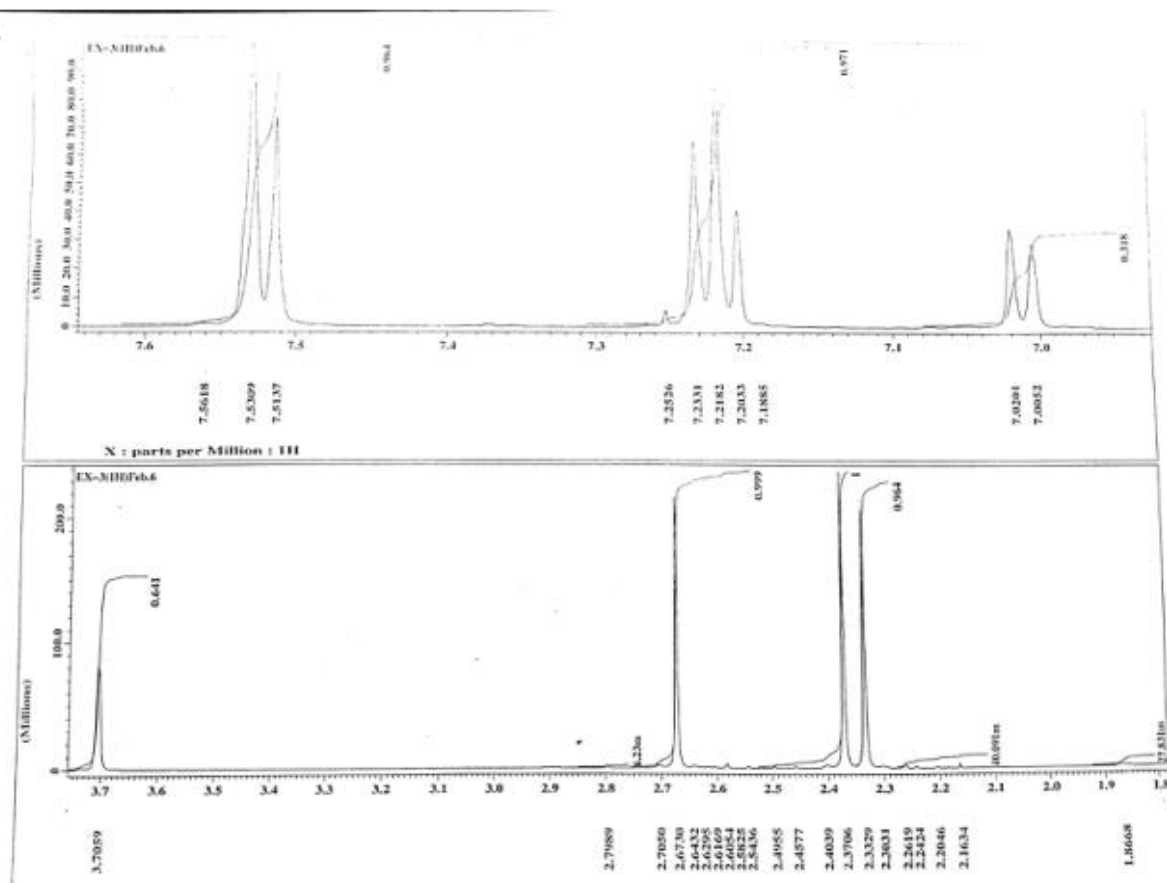

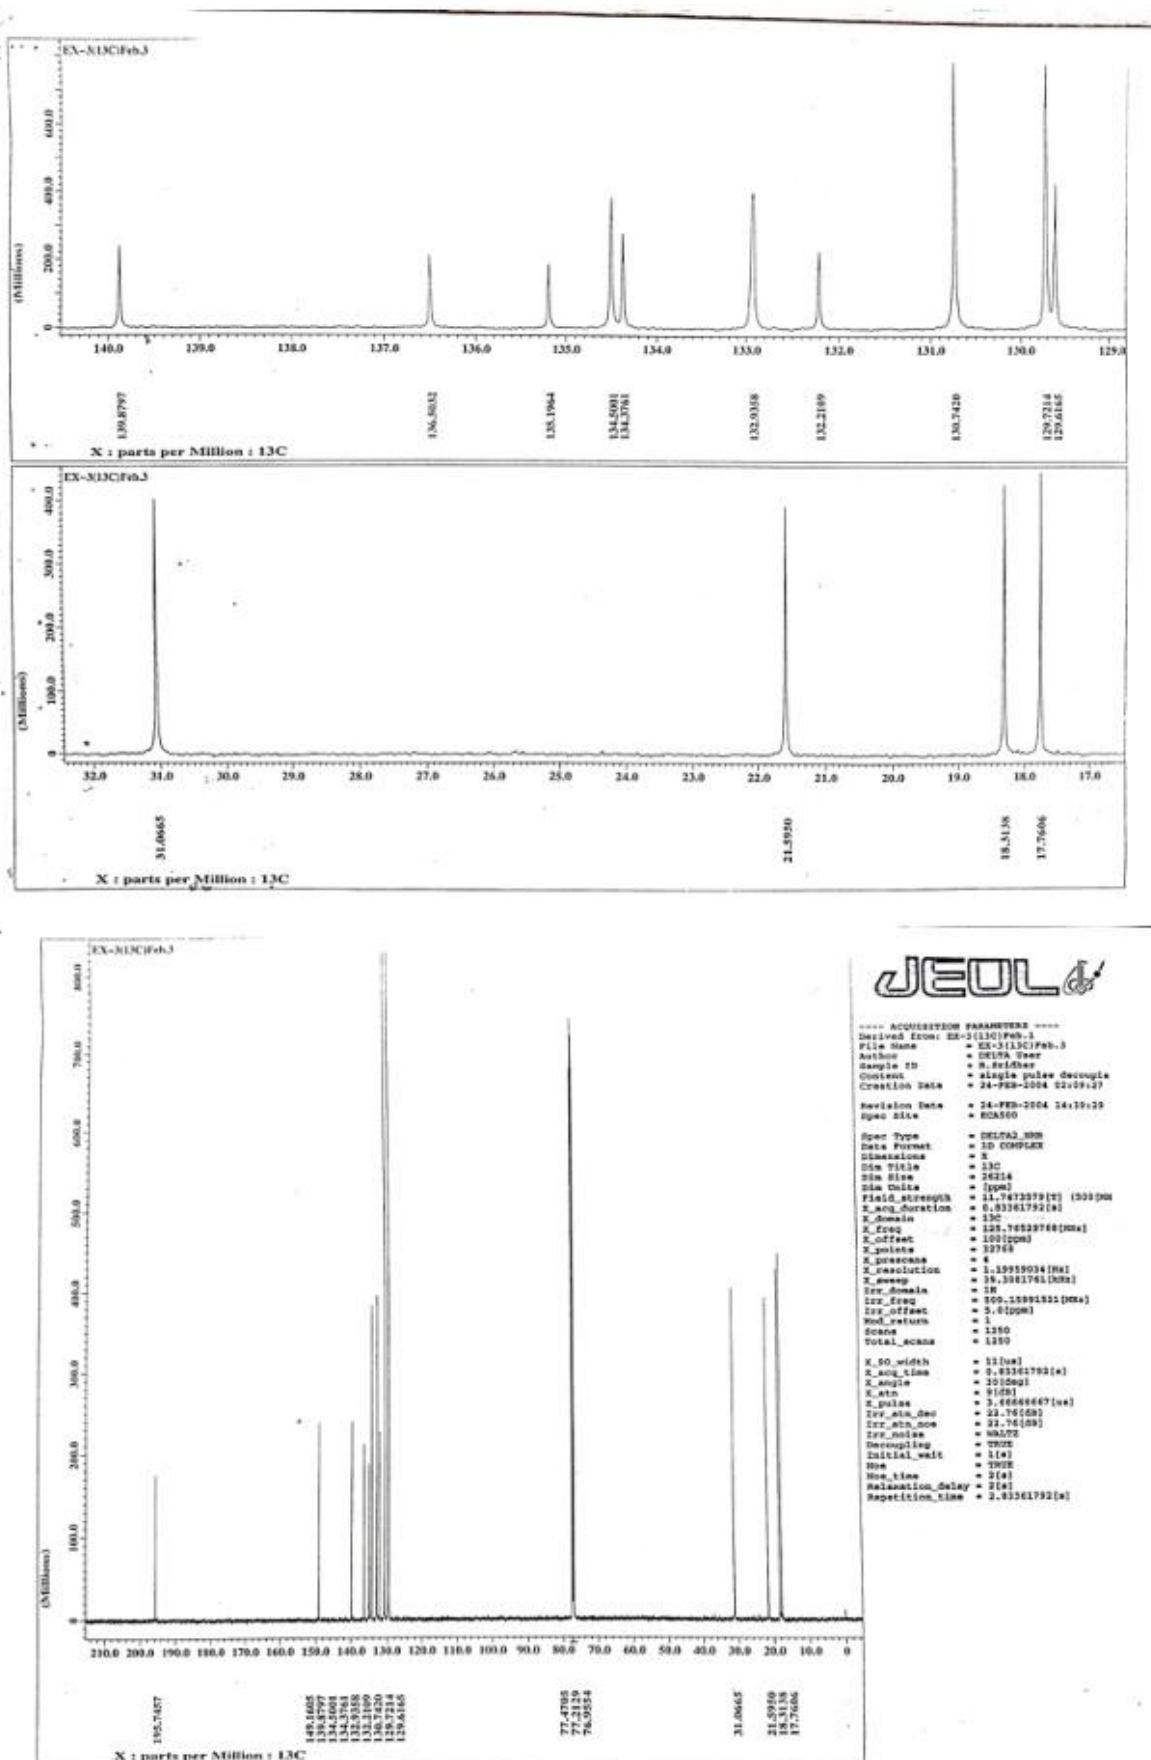

Figure S2.  $^1\text{H}$  NMR of IPX-18.

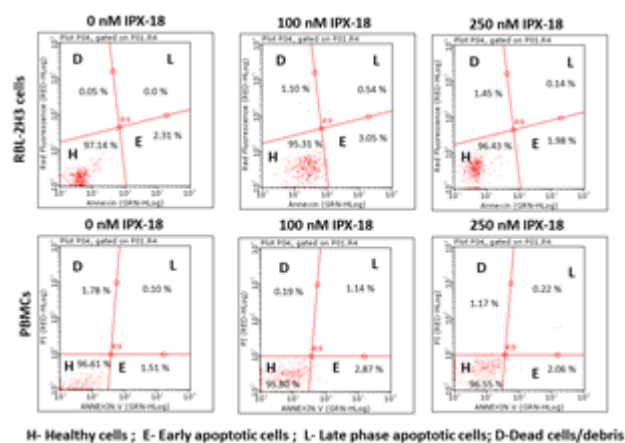

**Figure S3.** Representative graphs of the Annexin V assay in RBL-2H3 cells and PBMCs when treated with IPX-18 for 24 h. Results indicate no evidence of increment in the early or late apoptotic population in both cell types when treated with 100 nM or 250 nM IPX-18.

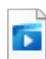

Supplementary  
video 1.mp4

**Video S1.** Simulation trajectory video shows the binding stability of IPX frame-by-frame.
